# Supplementary material for: Rigid templating of high surface-area, mesoporous, nanocrystalline rutile using a polyether block amide copolymer template
Source: Royal Society of Chemistry journal article supplement (doi:10.1039/c0cc01394c), 2010-01-01
Supplement: c0cc01394c.pdf [file c0cc01394c.pdf]

Supporting Information

**Rigid Templating of High Surface-Area, Mesoporous, Nanocrystalline Metal Oxide Using a Polyether Block Amide Copolymer Template**

**Xingmao Jiang<sup>a, b</sup> and C. Jeffrey Brinker<sup>a, c, d\*</sup>**

<sup>a</sup> Aerosol and Respiratory Dosimetry Program, Lovelace Respiratory Research Institute, Albuquerque, NM 87108, USA.

<sup>b</sup> Center for Micro-Engineered Materials, the University of New Mexico, Albuquerque, NM 87131, USA

<sup>c</sup> Sandia National Laboratories, MS 1349, Albuquerque, NM 87106, USA.

<sup>d</sup> Departments of Molecular Genetics and Microbiology, The University of New Mexico, USA

\*Corresponding Author: Sandia National Laboratories, MS1349, Albuquerque, NM 87106, USA. Fax: 01-505-272-7336; Tel: 01-505-272-7627; E-mail: cjbrink@sandia.gov

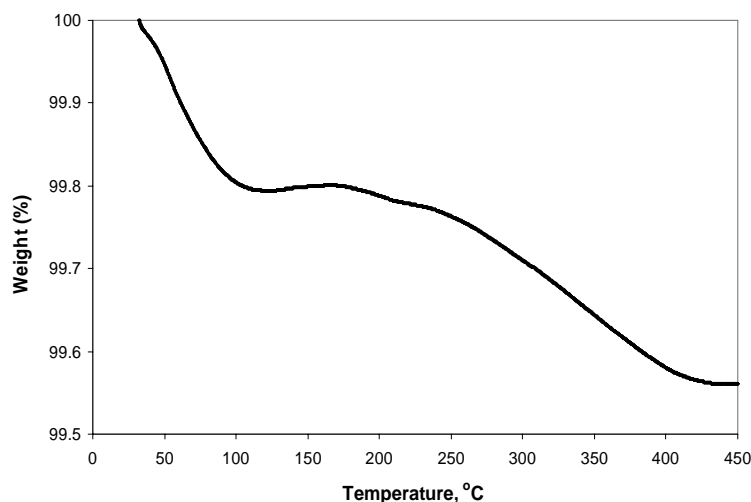

Figure S1. TGA analysis of washed rutile sample

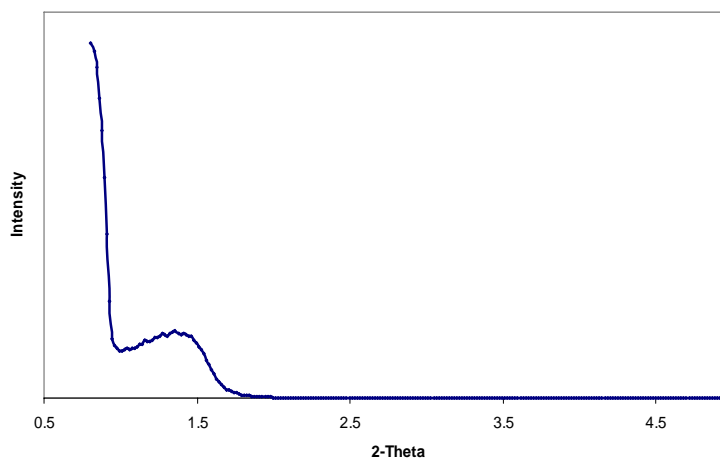

Figure S2. Low angle XRD for original undoped Pebax® 2533 film.

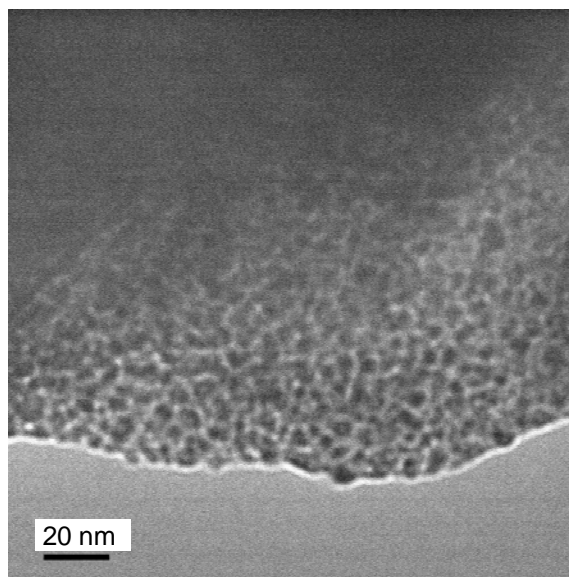

Figure S3. TEM image for PEBA film doped with Os salt.
